# Supplementary material
Source: PubMed Central journal article supplement (PMC9742315)
Supplement: NIHMS1838987-supplement-5.pdf [file NIHMS1838987-supplement-5.pdf]

**Supplementary Table 3. Roche Universal Probe Library (UPL) gene expression assays**

| Gene          | Species | Accession #    | F Primer                 | R Primer                 | UPL |
|---------------|---------|----------------|--------------------------|--------------------------|-----|
| <i>ADRB3</i>  | Human   | NM_000025.2    | tctactctgcgctggctttt     | ggaagaaaagagtgaggattagc  | 34  |
| <i>LIPE</i>   | Human   | NM_005357.3    | aaaccagtgctcggaaacac     | caggtcctatgttgatga       | 90  |
| <i>STAT1</i>  | Human   | NM_007315.3    | tgagttgattctgtctgaagt    | acacctcgtaaaactcctcag    | 32  |
| <i>ISG15</i>  | Human   | NM_005101.3    | gaggcagcgaactcatctt      | agcatctcaccgtcaggctc     | 76  |
| <i>IRF1</i>   | Human   | NM_002198.2    | ggcacatcccagtggaag       | cccttctcatctcatctg       | 56  |
| <i>ADIPOQ</i> | Human   | NM_004797.2    | ggtgagaagggtgagaagga     | ttcaccgatgtctcccttag     | 85  |
| <i>TBP</i>    | Human   | NM_003194.4    | cccatgactccatgacc        | ttacaaccaagattcactgtg    | 51  |
| <i>Adrb3</i>  | Mouse   | NM_013462.3    | ccttcgctgtctctgtgt       | ttcatagccatcaaacctgtg    | 20  |
| <i>Mcp1</i>   | Mouse   | NM_011333.3    | catccacgtgttgctca        | gatcatctgctggatgatg      | 62  |
| <i>Il6</i>    | Mouse   | NM_031168.1    | gctaccaaacctggatatacagga | ccaggtagctatggtactccagaa | 6   |
| <i>Tnfa</i>   | Mouse   | NM_013693.2    | ctgtagcccacgtcgtagc      | ttgatccatgcccgttg        | 25  |
| <i>Stat3</i>  | Mouse   | NM_011486.5    | agtctcgctcctccagac       | gctgcttctgtcactacgg      | 26  |
| <i>Rel</i>    | Mouse   | NM_009044.2    | tttcttctgatgaacatgg      | cacggcagatcctaattctg     | 16  |
| <i>Rela</i>   | Mouse   | NM_009045.5    | cagaccgcagtatccatagctt   | gctccaggtctcgtctctt      | 47  |
| <i>Nfkb1</i>  | Mouse   | NM_008689.2    | cgctgtctgctctctctg       | cgctctctcgtcactct        | 20  |
| <i>Ikkb</i>   | Mouse   | NM_001159774.1 | ccggaaagtgtcagctgtatc    | cctcagctggaagaaggaga     | 92  |
| <i>Birc3</i>  | Mouse   | NM_007464.3    | gagaggagcagatggagcag     | ttgttctccggattagtc       | 63  |
| <i>Il18</i>   | Mouse   | NM_008360.1    | caaacctccaatcactcct      | tccttgagtgacgcaaga       | 46  |
| <i>Hif1a</i>  | Mouse   | NM_010431.2    | catgatggctcccttttca      | gtcacctggtgtgcaata       | 18  |
| <i>Pai-1</i>  | Mouse   | NM_008871.2    | aggatcgaggtaaaccgagagc   | gcgggctgagatgacaaa       | 69  |
| <i>Cd9</i>    | Mouse   | NM_007657.3    | gatattcgccattgagatagcc   | tggtagggtcctgtgaaaactcc  | 45  |
| <i>Fbn1</i>   | Mouse   | NM_007993.2    | cctgacctaaaacctggaaga    | ggttttgtgggtccagagta     | 2   |
| <i>Pdgfra</i> | Mouse   | NM_011058.3    | cagacattgacctgttcca      | cttccgaagtctgtgagctgt    | 69  |
| <i>Prrx1</i>  | Mouse   | NM_175686.3    | ctgagactgaaggccaagga     | tcagttgactgtggcacct      | 6   |
| <i>Fsp1</i>   | Mouse   | NM_011311.2    | ggagctgcctagcttctg       | tctggaagtcaactcattgtc    | 56  |
| <i>Glut4</i>  | Mouse   | NM_009204.2    | gacggacactccatctgttg     | gccacgatggagacatagc      | 5   |
| <i>Pepck</i>  | Mouse   | NM_011044.2    | atgtgtggcgatgacatt       | aaccggtttctgggtgat       | 105 |
| <i>Pparg2</i> | Mouse   | NM_011146.3    | gaaagacaacggacaaatcacc   | gggggtgatatgttgaactg     | 7   |
| <i>Adipoq</i> | Mouse   | NM_009605.4    | ggagagaaaggagatgcaggt    | cttctgccagggttc          | 17  |
| <i>Lep</i>    | Mouse   | NM_008493.3    | caggatcaatgacattcacaca   | gctggtgaggacctgtgat      | 93  |
| <i>Acaca</i>  | Mouse   | NM_133360.2    | ggctcaaaactgcaggtatcc    | ttccaatccactcgaaga       | 103 |
| <i>Scd1</i>   | Mouse   | NM_009127.4    | ttccctctgcaagctctac      | cagagcgtggctatgtagt      | 34  |
| <i>Mcat</i>   | Mouse   | NM_001030014.2 | cagtgtgggagagttgctg      | cctcaccgcatacagacc       | 67  |
| <i>Lipe</i>   | Mouse   | NM_010719.5    | gcgctggaggagtgtttt       | cgctctccagttgaaccaag     | 3   |
| <i>Atgl</i>   | Mouse   | NM_025802.3    | gtcatatgcccttctctgt      | ttctgatctctccaagttct     | 38  |
| <i>Stat1</i>  | Mouse   | NM_001205313.1 | aaatgtgaaggatcaagctatg   | catctgtaattcttagggctga   | 15  |
| <i>Isg15</i>  | Mouse   | NM_015783.3    | agtcgaccagctctgactct     | ccccagcatctcacctta       | 71  |

|              |       |             |                           |                         |    |
|--------------|-------|-------------|---------------------------|-------------------------|----|
| <i>Irf1</i>  | Mouse | NM_008390.2 | gcaccactgatctgtataacctaca | cctcatcctcgtctgttc      | 10 |
| <i>Pgc1a</i> | Mouse | NM_008904.2 | gaaagggccaaacagagaga      | gtaaatcacacggcgctctt    | 29 |
| <i>Ucp1</i>  | Mouse | NM_009463.3 | ggcctctacgactcagcca       | taagccggctgagatctgt     | 34 |
| <i>Cyts</i>  | Mouse | NM_007808.4 | gctgctgtattatggcattga     | gattctcagaaggcaagtgccta | 20 |
| <i>Cpt1b</i> | Mouse | NM_009948.2 | gagtgactggtggaagaatag     | gctgctgcacattgtgtt      | 92 |
| <i>Pdk4</i>  | Mouse | NM_013743.2 | cgcttagtgaacctctctcg      | cttctgggctcttctcatgg    | 22 |
